# Supplementary material
Source: ML conference proceedings conference paper supplement (https://proceedings.neurips.cc/paper_files/paper/2019/hash/9f36407ead0629fc166f14dde7970f68-Abstract.html)
Supplement: Supplementary file [file 9f36407ead0629fc166f14dde7970f68-Supplemental.zip]

## 439 Appendices

440 The appendices that follow provide the proofs of the results in the body of the paper. Throughout  
 441 the proofs in the appendix we use the following notation to denote the hitting and movement costs  
 442 of the online learner:  $H_t := f_t(x_t)$  and  $M_t := c(x_t, x_{t-1})$ , where  $x_t$  is the point chosen by the  
 443 online algorithm at time  $t$ . Similarly, we denote the hitting and movement costs of the offline optimal  
 444 (adversary) as  $H_t^* := f_t(x_t^*)$  and  $M_t^* := c(x_t^*, x_{t-1}^*)$ , where  $x_t^*$  is the point chosen by the offline  
 445 optimal at time  $t$ .

446 Before moving to the proofs, we summarize a few standard definitions that are used throughout the  
 447 paper.

448 **Definition 1.** A function  $f : \mathcal{X} \rightarrow \mathbb{R}$  is  $\alpha$ -strongly convex with respect to a norm  $\|\cdot\|$  if for all  $x, y$  in  
 449 the relative interior of the domain of  $f$  and  $\lambda \in (0, 1)$ , we have

$$f(\lambda x + (1 - \lambda)y) \leq \lambda f(x) + (1 - \lambda)f(y) - \frac{\alpha}{2}\lambda(1 - \lambda)\|x - y\|^2.$$

450 **Definition 2.** A function  $f : \mathcal{X} \rightarrow \mathbb{R}$  is  $\beta$ -strongly smooth with respect to a norm  $\|\cdot\|$  if  $f$  is  
 451 everywhere differentiable and if for all  $x, y$  we have

$$f(y) \leq f(x) + \langle \nabla f(x), y - x \rangle + \frac{\beta}{2}\|y - x\|^2.$$

452 **Definition 3.** A function  $f : \mathbb{R}^d \rightarrow \mathbb{R}$  is quasiconvex if its domain  $\mathcal{X}$  and all its sublevel sets

$$S_\alpha = \{x \in \mathcal{X} \mid f(x) \leq \alpha\},$$

453 for  $\alpha \in \mathbb{R}$ , is convex.

454 **Definition 4.** For a norm  $\|\cdot\|$  in  $\mathcal{X}$ , its dual norm (on  $\mathcal{X}$ )  $\|\cdot\|_*$  is defined to be

$$\|y\|_* = \sup\{\langle x, y \rangle \mid \|x\| \leq 1\}.$$

455 **Definition 5.** For a convex function  $f : \mathcal{X} \rightarrow \mathbb{R}$ , its Fenchel Conjugate  $f^*$  is defined to be

$$f^*(y) = \sup\{\langle x, y \rangle - f(x) \mid x \in \mathcal{X}\}.$$

456 Next, we introduce a few technical lemmas that are important throughout our analysis.

457 The first technical lemma is a characterization of strongly convex functions.

458 **Lemma 1.** Suppose  $f$  is  $\alpha$ -strongly convex for some  $\alpha > 0$  with respect to some norm  $\|\cdot\|$  and  
 459 both  $f$  and  $f^*$  are differentiable, then the first condition implies the second condition and the third  
 460 condition:

- 461 1.  $\forall x, y, f(y) \leq f(x) + \langle \nabla f(x), y - x \rangle + \frac{\beta}{2}\|x - y\|^2$ ;
- 462 2.  $\forall x, y, f(y) \geq f(x) + \langle \nabla f(x), y - x \rangle + \frac{1}{2\beta}\|\nabla f(x) - \nabla f(y)\|_*^2$ ;
- 463 3.  $\forall x, y, \|\nabla f(x) - \nabla f(y)\|_* \leq \beta\|x - y\|$ .

464 To prove Lemma 1, we use Lemma 2, Lemma 3, and Lemma 4 below.

465 The following lemma is Theorem 6 in [25].

466 **Lemma 2.** If  $f$  is convex and closed, the following two conditions are equivalent:

- 467 1.  $\forall x, y, f(y) \geq f(x) + \langle \nabla f(x), y - x \rangle + \frac{\beta}{2}\|x - y\|^2$ ;
- 468 2.  $\forall x, y, f^*(y) \leq f^*(x) + \langle \nabla f^*(x), y - x \rangle + \frac{1}{2\beta}\|x - y\|_*^2$

469 i.e.  $f$  is  $\beta$ -strongly convex w.r.t some norm  $\|\cdot\|$  if and only if  $f^*$  is  $\frac{1}{\beta}$ -strongly smooth w.r.t the dual  
 470 norm  $\|\cdot\|_*$ .

471 The next lemma is a special case of Lemma 17 in [34].

472 **Lemma 3.** Let  $f$  be a closed, convex, and differentiable function. Then we have

$$f^*(\nabla f(x)) + f(x) = \langle \nabla f(x), x \rangle.$$

473 Now we prove a technical result that describes a property of the gradient of the Fenchel Conjugate.

474 **Lemma 4.** Suppose  $f$  is  $\alpha$ -strongly convex for some  $\alpha > 0$  with respect to some norm  $\|\cdot\|$  and both  
475  $f$  and  $f^*$  are differentiable. Then we have

$$x = \nabla f^*(\nabla f(x)), \forall x.$$

476 *Proof.* For convenience, we define  $y = \nabla f(x)$  and  $x' = \nabla f^*(y)$ . It suffices to prove that  $x' = x$ .

477 By Lemma 3, we obtain

$$f^*(y) + f(x) = \langle y, x \rangle = \langle x, y \rangle. \quad (1)$$

478 Again by Lemma 3, we have

$$f(x') + f^*(y) = f^{**}(x') + f^*(y) = \langle x', y \rangle, \quad (2)$$

479 where we use the fact that  $f^{**} = f$ .

480 Combining inequalities (1) and (2), we obtain

$$0 = f(x) - f(x') - \langle x - x', y \rangle = f(x) + \langle x' - x, \nabla f(x) \rangle - f(x') \leq -\frac{\alpha}{2} \|x - x'\|^2,$$

481 where in the last inequality we use the definition of  $\alpha$ -strongly convex. Therefore we have proved  
482 that  $x = x'$ .  $\square$

483 Using the three lemmas above, we now prove Lemma 1.

484 *Proof of Lemma 1.* By the first condition and Lemma 2, we know  $f^*$  is  $\frac{1}{\beta}$ -strongly convex with  
485 respect to  $\|\cdot\|_*$ . Therefore we see

$$f^*(\nabla f(y)) \geq f^*(\nabla f(x)) + \langle \nabla f^*(\nabla f(x)), \nabla f(y) - \nabla f(x) \rangle + \frac{1}{2\beta} \|\nabla f(x) - \nabla f(y)\|_*^2.$$

486 Using Lemma 3 and Lemma 4, we obtain

$$\langle y, \nabla f(y) \rangle - f(y) \geq (\langle x, \nabla f(x) \rangle - f(x)) + \langle x, \nabla f(y) - \nabla f(x) \rangle + \frac{1}{2\beta} \|\nabla f(x) - \nabla f(y)\|_*^2.$$

487 Rearranging the terms, we get

$$f(x) \geq f(y) + \langle x - y, \nabla f(y) \rangle + \frac{1}{2\beta} \|\nabla f(x) - \nabla f(y)\|_*^2,$$

488 which is the second condition.

489 The third condition follows from subtracting the second condition from the first condition.  $\square$

490 Finally, before moving the the proofs of our main results, we prove two properties of the Bregman  
491 Divergence that play an important role in the analysis.

492 **Lemma 5.**  $\forall a, b, c \in \mathbb{R}^d$  and potential  $h$ , we have

$$\langle \nabla h(b) - \nabla h(c), c - a \rangle = D_h(a||b) - D_h(a||c) - D_h(c||b).$$

493 *Proof.* By the definition of Bregman Divergence, we obtain

$$\begin{aligned} & D_h(a||b) - D_h(a||c) - D_h(c||b) \\ &= (h(a) - h(b) - \langle \nabla h(b), a - b \rangle) - (h(a) - h(c) - \langle \nabla h(c), a - c \rangle) \\ &\quad - (h(c) - h(b) - \langle \nabla h(b), c - b \rangle) \\ &= -\langle \nabla h(b), a - b \rangle + \langle \nabla h(c), a - c \rangle + \langle \nabla h(b), c - b \rangle \\ &= (-\langle \nabla h(b), a - b \rangle + \langle \nabla h(b), c - b \rangle) + \langle \nabla h(c), a - c \rangle \\ &= \langle \nabla h(b), c - a \rangle + \langle \nabla h(c), a - c \rangle \\ &= \langle \nabla h(b) - \nabla h(c), c - a \rangle. \end{aligned}$$

494  $\square$

**Lemma 6.** For all  $a, b, c \in \mathbb{R}^d$ , we have

$$D_h(c||a) - D_h(c||b) = D_h(0||a) - D_h(0||b) + \langle \nabla h(b) - \nabla h(a), c \rangle.$$

495 *Proof.* Using the definition of Bregman divergence, we obtain

$$\begin{aligned} D_h(c||a) - D_h(c||b) &= h(c) - h(a) - \langle \nabla h(a), c - a \rangle - h(c) + h(b) + \langle \nabla h(b), c - b \rangle \\ &= (h(b) - \langle \nabla h(b), b \rangle) - (h(a) - \langle \nabla h(a), a \rangle) + \langle \nabla h(b) - \nabla h(a), c \rangle \\ &= D_h(0||a) - D_h(0||b) + \langle \nabla h(b) - \nabla h(a), c \rangle. \end{aligned}$$

496

□

## 497 A Proof of Theorem 1

498 We consider a sequence of hitting cost functions on the real line such that the algorithm stays at the  
499 starting point through time steps  $t = 1, 2, \dots, n$  and is forced to incur a huge movement cost at time  
500 step  $t = n + 1$ , whereas the offline adversary can pay relatively little cost by dividing the long trek  
501 between  $x_0$  and  $v_{n+1}$  into multiple small steps through time steps  $t = 1, 2, \dots, n + 1$ .

502 Specifically, suppose the starting point of the algorithm and the offline adversary is  $x_0 = x_0^* = 0$ ,  
503 and the hitting cost functions are

$$f_t(x) = \begin{cases} \frac{m}{2}x^2 & t \in \{1, 2, \dots, n\} \\ \frac{m'}{2}(x-1)^2 & t = n+1 \end{cases}$$

504 for some large parameter  $m'$  that we choose later.

505 Suppose the algorithm first moves at time step  $t_0$ . If  $t_0 < n + 1$ , we stop the game at time step  $t_0$  and  
506 compare the algorithm with an offline adversary which always stays at  $x = 0$ . The total cost of offline  
507 adversary is 0, but the total cost of the algorithm is non-zero. So, the competitive ratio is unbounded.

508 Next we consider the case where  $t_0 \geq n + 1$ . This implies that  $x_1, \dots, x_n = 0$  and  $x_{n+1}$  is some  
509 non-zero point, say  $x$ . We see that the cost incurred by the online algorithm is

$$\text{cost}(ALG) \geq \min_{x_{n+1}} (M_{n+1} + H_{n+1}) = \min_x \left( \frac{1}{2}x^2 + \frac{m'}{2}(x-1)^2 \right).$$

510 Notice that the right hand side tends to  $\frac{1}{2}$  as  $m'$  tends to infinity; specifically, we have

$$\text{cost}(ALG) \geq \min_x \left( \frac{1}{2}x^2 + \frac{m'}{2}(x-1)^2 \right) = \frac{1}{2(1 + \frac{1}{m'})}. \quad (3)$$

511 Now let us consider the offline optimal. Notice that, in the limit as  $m'$  tends to infinity, the offline  
512 optimal must satisfy  $x_0^* = 0$  and  $x_{n+1}^* = 1$ ; otherwise it would incur unbounded cost. Our lower  
513 bound is derived by considering the case when  $m' \rightarrow \infty$  and so we constrain the adversary to satisfy  
514 the above, knowing that the adversary is not optimal for finite  $m'$ , i.e.,  $\text{cost}(ADV) \geq \text{cost}(OPT)$   
515 with  $\text{cost}(ADV) \rightarrow \text{cost}(OPT)$  as  $m' \rightarrow \infty$ .

516 Let the sequence of points the adversary chooses as  $x^* = (x_0^*, x_1^*, \dots, x_{n+1}^*) \in \mathbb{R}^{n+2}$ . We compute  
517 the cost incurred by the adversary as follows where, to simplify presentation, we define  $\mathcal{K}(n, y)$  to be  
518 the set  $\{x \in \mathbb{R}^{n+2} \mid x_i \leq x_{i+1}, x_0 = 0, x_{n+1} = y\}$ .

$$\begin{aligned} a_n &= 2 \min_{x^* \in \mathcal{K}(n, 1)} \sum_{i=1}^{n+1} (H_i^* + M_i^*) \\ &= 2 \min_{x^* \in \mathcal{K}(n, 1)} \left( \sum_{i=1}^n \frac{m}{2} (x_i^*)^2 + \sum_{i=1}^{n+1} \frac{1}{2} (x_i^* - x_{i-1}^*)^2 \right). \end{aligned}$$

519 In words,  $a_n$  is twice the minimal offline cost subject to the constraints  $x_0^* = 0, x_{n+1}^* = 1$ . We derive  
520 the limiting behavior of the offline costs as  $n \rightarrow \infty$  in the following lemma.

521 **Lemma 7.** For  $m > 0$ , define

$$a_n = 2 \min_{x^* \in \mathcal{K}(n,1)} \left( \sum_{i=1}^n \frac{m}{2} (x_i^*)^2 + \sum_{i=1}^{n+1} \frac{1}{2} (x_i^* - x_{i-1}^*)^2 \right).$$

522 Then we have  $\lim_{n \rightarrow \infty} a_n = \frac{-m + \sqrt{m^2 + 4m}}{2}$ .

523 Given the lemma, the total cost of the offline adversary will be  $\frac{a_n}{2}$ . Finally, applying (3), we know  
524  $\forall n$  and  $\forall m' > 0$ ,

$$\frac{\text{cost}(\text{ALG})}{\text{cost}(\text{ADV})} \geq \frac{\frac{1}{2(1+\frac{1}{m'})}}{\frac{a_n}{2}} = \frac{1}{(1 + \frac{1}{m'})a_n}.$$

525 By taking the limit  $n \rightarrow \infty$  and  $m' \rightarrow \infty$  and using Lemma 7, we obtain

$$\frac{\text{cost}(\text{ALG})}{\text{cost}(\text{OPT})} = \lim_{n, m' \rightarrow \infty} \frac{\text{cost}(\text{ALG})}{\text{cost}(\text{ADV})} \geq \left( \frac{-m + \sqrt{m^2 + 4m}}{2} \right)^{-1} = \frac{1 + \sqrt{1 + \frac{4}{m}}}{2}.$$

526 All that remains is to prove Lemma 7, which describes the cost of the offline adversary in the limit as  
527  $n$  tends to infinity.

528 *Proof of Lemma 7.* Using the fact that the costs are all homogeneous of degree 2, we see that for all  
529  $y \in [0, 1]$ , we have

$$\begin{aligned} & \min_{x^* \in \mathcal{K}(n,y)} \left( \sum_{i=1}^n \frac{m}{2} (x_i^*)^2 + \sum_{i=1}^{n+1} \frac{1}{2} (x_i^* - x_{i-1}^*)^2 \right) \\ &= y^2 \min_{x^* \in \mathcal{K}(n,1)} \left( \sum_{i=1}^n \frac{m}{2} (x_i^*)^2 + \sum_{i=1}^{n+1} \frac{1}{2} (x_i^* - x_{i-1}^*)^2 \right). \end{aligned} \quad (4)$$

530 The sequence  $\{a_n\}$ ,  $n \geq 0$  has a recursive relationship as follows:

$$\begin{aligned} a_{n+1} &= 2 \min_{x^* \in \mathcal{K}(n+1,1)} \left( \sum_{i=1}^{n+1} \frac{m}{2} (x_i^*)^2 + \sum_{i=1}^{n+2} \frac{1}{2} (x_i^* - x_{i-1}^*)^2 \right) \\ &= 2 \min_{0 \leq x \leq 1} \left( \min_{x^* \in \mathcal{K}(n,x)} \left( \sum_{i=1}^n \frac{m}{2} (x_i^*)^2 + \sum_{i=1}^{n+1} \frac{1}{2} (x_i^* - x_{i-1}^*)^2 \right) \right. \\ &\quad \left. + \frac{m}{2} x^2 + \frac{1}{2} (1-x)^2 \right) \\ &= 2 \min_{0 \leq x \leq 1} \left( x^2 \min_{x^* \in \mathcal{K}(n,1)} \left( \sum_{i=1}^n \frac{m}{2} (x_i^*)^2 + \sum_{i=1}^{n+1} \frac{1}{2} (x_i^* - x_{i-1}^*)^2 \right) \right. \\ &\quad \left. + \frac{m}{2} x^2 + \frac{1}{2} (1-x)^2 \right) \\ &= 2 \min_{0 \leq x \leq 1} \left( \frac{a_n}{2} x^2 + \frac{m}{2} x^2 + \frac{1}{2} (1-x)^2 \right) \\ &= \frac{a_n + m}{a_n + m + 1}. \end{aligned} \quad (5)$$

531 Solving the equation  $x = \frac{x+m}{x+m+1}$ , we find the two fixed points of the recursive relationship  $a_{n+1} =$   
532  $\frac{a_n + m}{a_n + m + 1}$  are

$$x_1 = \frac{-m + \sqrt{m^2 + 4m}}{2},$$

533 and

$$x_2 = \frac{-m - \sqrt{m^2 + 4m}}{2}.$$

534 Notice that for  $i = 1, 2$ , we have

$$m - (m + 1)x_i = -(1 - x_i)x_i.$$

535 Using this property, we obtain

$$a_{n+1} - x_1 = \frac{a_n + m}{a_n + m + 1} - x_1 = \frac{(1 - x_1)a_n + m - (m + 1)x_1}{a_n + m + 1} = \frac{(1 - x_1)(a_n - x_1)}{a_n + m + 1}, \quad (6)$$

536 and

$$a_{n+1} - x_2 = \frac{a_n + m}{a_n + m + 1} - x_2 = \frac{(1 - x_2)a_n + m - (m + 1)x_2}{a_n + m + 1} = \frac{(1 - x_2)(a_n - x_2)}{a_n + m + 1}. \quad (7)$$

Notice that  $a_{n+1} - x_2 > 0$ . By dividing equations (6) and (7), we obtain

$$\left( \frac{a_{n+1} - x_1}{a_{n+1} - x_2} \right) = \frac{1 - x_1}{1 - x_2} \cdot \left( \frac{a_n - x_1}{a_n - x_2} \right), \forall n \geq 0.$$

Remember that  $a_0 = 1$ . Therefore we have

$$\left( \frac{a_n - x_1}{a_n - x_2} \right) = \left( \frac{1 - x_1}{1 - x_2} \right)^n \left( \frac{a_0 - x_1}{a_0 - x_2} \right) = \left( \frac{1 - x_1}{1 - x_2} \right)^{n+1}.$$

Rearranging this equation, we get

$$a_n = \left( 1 - \left( \frac{1 - x_1}{1 - x_2} \right)^{n+1} \right)^{-1} \left( x_1 - x_2 \cdot \left( \frac{1 - x_1}{1 - x_2} \right)^{n+1} \right).$$

537 Since  $0 < \left( \frac{1 - x_1}{1 - x_2} \right) < 1$ , we have

$$\lim_{n \rightarrow \infty} a_n = x_1 = \frac{-m + \sqrt{m^2 + 4m}}{2}. \quad (8)$$

538

□

## 539 B Proof of Theorem 2

540 Our proof of Theorem 2 relies on a set of technical lemmas, which follow. Lemma 8 and Lemma  
541 10 work together to establish a lower bound on the competitive ratio as  $m$  tends to zero when the  
542 balance parameter  $\gamma$  is set to be  $o(1/m)$ , while Lemma 11 lower bound on the competitive ratio as  
543  $m$  tends to zero when the balance parameter  $\gamma$  is set to be  $\Omega(1/m)$ .

544 **Lemma 8.** *If  $\gamma = o(1/m)$ , the competitive ratio of OBD is  $\Omega(1/(\gamma m))$  when  $m \rightarrow 0^+$ .*

545 *Proof.* Our approach is to construct a scenario where OBD is forced to move along the circumference  
546 of a large circle, but the offline adversary moves along the circumference of a much smaller circle (see  
547 Figure 1). The adversary is hence able to pay much smaller movements costs, forcing the competitive  
548 ratio to be large.

549 We propose a series of costs which force OBD to move in a circle. The idea is to construct a cost  
550 function so that, at the end of every round, the relative positions of the OBD algorithm, the offline  
551 adversary, and the minimizer are fixed. Since OBD is memoryless, we can simply input this function  
552 arbitrarily many times and the positions of OBD and the offline adversary will trace out a pair of  
553 concentric circles (see Figure 1).

554 Suppose that, at the start of a round, OBD is at the point  $A$ . Let  $\ell$  be the distance between OBD and  
555 the adversary. Consider a right triangle  $ABC$  such that  $|AB| = h = \sqrt{\gamma m} \ell$ , the offline adversary is  
556 at some point  $D$  on the hypotenuse  $AC$  and  $|AD| = |BC| = \ell$  (see Figure 2). Let us introduce a  
557 coordinate system such that the origin lies at  $C$ , the  $x$ -axis contains  $BC$  and the  $y$ -axis is parallel

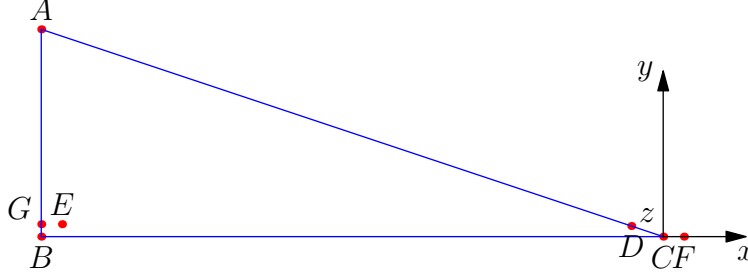

Figure 2: In the right triangle  $\triangle ABC$ ,  $\angle ABC = 90^\circ$ ,  $|BC| = \ell$ ,  $|AB| = h = \sqrt{\gamma m} \ell$ . Point  $D$  is on the line segment  $AC$  such that  $|AD| = \ell$ . OBD starts at point  $A$  and selects point  $E$ . The offline adversary starts at point  $D$  and selects point  $F$ .  $G$  is the projection point of  $E$  on line segment  $AB$ .

to  $AB$ , such that the positive part of the axis lies on the same side of  $BC$  as the segment  $AC$ . Our goal is to construct a cost function which forces OBD towards  $B$ . This will preserve the relative positions of OBD and the adversary, since we assumed that they were a distance  $\ell$  away at the start of the round. Consider the costs  $g(u) = \frac{m}{2} \|u - C\|^2$ ,  $h(u) = \alpha \cdot d(u, BC)$  where  $d(u, BC)$  is the distance from the point  $u$  to the line passing through  $B$  and  $C$  and  $\alpha > 0$  is a parameter we will pick later. Define  $f_t(u) = h(u) + g(u)$ . Notice that  $f_t$  is  $m$ -strongly convex because it is the sum of an  $m$ -strongly convex function and a convex function. Intuitively, when  $\alpha$  is large, the function  $f_t$  is infinity outside of the line  $BC$  but is equal to  $g(u) = \frac{m}{2} \|u - C\|^2$  when restricted to points  $u$  on the line. After observing the cost  $f_t$ , OBD will pick some new point  $E$ .

The following lemma highlights that  $E$  can be driven arbitrarily close to  $B$  by taking  $\alpha$  to be sufficiently large.

**Lemma 9.** Let  $\varepsilon > 0$ , and suppose  $\alpha$  is picked to that  $\alpha > \frac{hm\ell^2}{\varepsilon^2}$ . Then the point  $E$  picked by OBD satisfies  $|EB| < \varepsilon$ .

We instruct the adversary to pick the point  $F$  on the line  $BC$  (the  $x$ -axis) such that  $EF = \ell$  (see Figure 2). Notice that  $|CF| = |BF| - |BC| \leq |BE| + |EF| - |BC| = |EB| + \ell - \ell < \varepsilon$ , where we used the triangle inequality. Let  $z = |DC|$ . We see that the total cost incurred by the offline adversary is

$$M_t^* + H_t^* = \frac{1}{2} |DF|^2 + \frac{m}{2} |CF|^2 \leq \frac{1}{2} (|DC| + |CF|)^2 + \frac{m}{2} |CF|^2 \leq \frac{1}{2} (z + \varepsilon)^2 + \frac{m\varepsilon^2}{2},$$

where we applied the triangle inequality.

Notice that  $h = |AB| = \sqrt{|AC|^2 - |BC|^2}$  by the Pythagorean theorem (recall that  $ABC$  is a right triangle). Since  $|AC| = \ell + z$  and  $|BC| = \ell$ , we see that  $h = \sqrt{2z\ell + z^2}$ . Hence the movement cost incurred by the OBD is

$$M_t \geq \frac{1}{2} (h - \varepsilon)^2 = \frac{1}{2} (\sqrt{2z\ell + z^2} - \varepsilon)^2.$$

Hence the ratio of the costs is

$$\frac{M_t + H_t}{M_t^* + H_t^*} \geq \frac{M_t}{M_t^* + H_t^*} \geq \frac{\frac{1}{2} (\sqrt{2z\ell + z^2} - \varepsilon)^2}{\frac{1}{2} (z + \varepsilon)^2 + \frac{m\varepsilon^2}{2}}.$$

Since the limit of this expression as  $\varepsilon \rightarrow 0$  is  $\frac{2z\ell + z^2}{z^2}$ , for sufficiently small  $\varepsilon$  this will be at least  $\frac{1}{2} \frac{2z\ell + z^2}{z^2} \geq \frac{\ell}{z}$ . Since  $z = \sqrt{h^2 + \ell^2} - \ell$  and  $h = \sqrt{\gamma m} \ell$ , the ratio of costs is at least

$$\frac{\ell}{\sqrt{\gamma m \ell^2 + \ell^2} - \ell} = \frac{1}{\sqrt{\gamma m + 1} - 1} = \frac{\sqrt{\gamma m + 1} + 1}{\gamma m} \geq \frac{2}{\gamma m}.$$

Now, we describe the whole process. When  $t = 1$ , the hitting cost function is  $f_1(x) = \frac{m}{2} \|x\|_2^2$ . While OBD stays at  $x = 0$ , the adversary moves to the point  $(\ell, 0)$ ; it incurs a one-time cost of

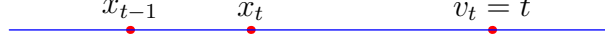

Figure 3: *Balance condition at time step  $t$  in Lemma 10. Starting from  $x_{t-1}$ , OBD picks  $x_t$  after observing the hitting cost function  $f_t(x) = \frac{m}{2}(x - t)^2$ .*

584  $M_1^* + H_1^* = \frac{1}{2}\ell^2 + \frac{m}{2}\ell^2$ . On all subsequent steps  $t = 2 \dots T$ , we repeatedly apply the construction,  
 585 which forces OBD to move in a circle. The one-time cost incurred by the adversary to setup the game  
 586 is negligible in the limit as  $T$  is large, and the per-round ratio of costs is  $\Omega(\frac{1}{\gamma m})$ , so the competitive  
 587 ratio is also  $\Omega(\frac{1}{\gamma m})$  as claimed.  $\square$

588 The key technical lemma used in the proof is Lemma 9, and we now provide a proof of that result.

589 *Proof of Lemma 9.* Suppose  $\alpha > \frac{hm\ell^2}{\varepsilon^2}$ . We first show that OBD selects the point  $E$  strictly contained  
 590 by the  $\frac{m}{2}\ell^2$ -level set, which is the one  $B$  lies on. First observe that the point  $B$  satisfies the balance  
 591 condition:  $\frac{1}{2}|AB|^2 = \gamma \frac{m}{2}|BC|^2$ , because we constructed  $ABC$  so that  $|AB| = h = \sqrt{\gamma m}\ell$  and  
 592  $|BC| = \ell$ . However, the point  $B$  is not necessarily a projection of  $A$  onto any level set of  $f_t$ . If OBD  
 593 projected onto the level set which  $B$  lies on, it would incur less cost than if it moved to  $B$ ; however  
 594 then the balance condition would be violated. To restore the balance condition, we must increase the  
 595 movement cost while decreasing the hitting cost – which means we must move to a strictly smaller  
 596 level set, say the  $\frac{m}{2}l_1^2$ -level set, where  $l_1 < \ell$ .

597 Let  $E_y$  denote the  $y$ -coordinate of  $E$ , using the coordinate system we define in the proof of Lemma  
 598 8. Notice that  $E_y = \frac{g(E)}{\alpha}$ , since  $g(E)$  was defined to be the vertical distance to the  $x$ -axis times  $\alpha$ .  
 599 Since  $g(E) \leq f_t(E)$ , we see that  $E_y \leq \frac{f_t(E)}{\alpha} = \frac{ml_1^2}{2\alpha} \leq \frac{ml^2}{2\alpha}$ , where we used the fact that  $E$  lies on  
 600 the  $\frac{m}{2}l_1^2$  level set and  $l_1 \leq \ell$ . By the balance condition,  $\frac{1}{2}|AE|^2 = \gamma \frac{m}{2}l_1^2 \leq \gamma \frac{m}{2}l^2 = \frac{1}{2}h^2$ . Let  $G$  be  
 601 the point with coordinates  $(B_x, E_y)$ . Applying the Pythagorean theorem successively to the right  
 602 triangle  $BEG$  and the right triangle  $AEG$ , we see that

$$\begin{aligned} |EB|^2 &= |E_x - B_x|^2 + E_y^2 \leq (|AE|^2 - (|AB| - E_y)^2) + E_y^2 \\ &\leq (|AB|^2 - (|AB| - E_y)^2) + E_y^2 \leq 2h \cdot E_y \leq h \frac{ml^2}{\alpha}, \end{aligned} \quad (9)$$

603 where we used the fact that  $|AB| \geq |AE|$  and  $|AB| = h$ . Since we picked  $\alpha > \frac{hm\ell^2}{\varepsilon^2}$ , we see that  
 604  $|EB| < \varepsilon$ .  $\square$

606 Now we move on to the next technical lemma in the proof of Theorem 2.

607 **Lemma 10.** *When  $\gamma = o(\frac{1}{m})$ , the competitive ratio of OBD is  $\Omega(\sqrt{\frac{\gamma}{m}})$ .*

608 *Proof.* We consider a sequence of cost functions on the real line such that the OBD algorithm moves  
 609 far away from the starting point, incurring significant movement costs, whereas the offline adversary  
 610 could pay relatively little cost by staying at the starting point. More specifically, we consider the  
 611 sequence of hitting cost functions  $f_t(x) = \frac{m}{2}(x - t)^2, t = 1, 2, \dots, n$ . The value of  $n$  will be picked  
 612 later. We assume the starting point is at zero.

613 Notice that by the balance condition we always have  $M_t = \gamma H_t$ , so  $\frac{1}{2}\|x_t - x_{t-1}\|^2 = \gamma \frac{m}{2}\|x_t - t\|^2$ .

614 We can rearrange this expression to obtain  $\frac{x_t - x_{t-1}}{t - x_{t-1}} = \sqrt{\gamma m}$ . Define

$$\lambda = \frac{x_t - x_{t-1}}{t - x_{t-1}} = \frac{\sqrt{\gamma m}}{1 + \sqrt{\gamma m}}.$$

615 We obtain the recursive equation  $x_t = x_{t-1} + (t - x_{t-1})\lambda$  with initial condition  $x_0 = 0$ . Solving  
 616 this equation, we obtain  $x_t = t - \frac{1-\lambda}{\lambda}(1 - (1 - \lambda)^t)$ .

617 Suppose we picked  $n$  to be  $\lceil \frac{1}{\lambda} \rceil$ . By assumption,  $\gamma = o(\frac{1}{m})$ ; hence in the limit as  $m$  tends to zero,  $\lambda$   
 618 also tends to zero. Notice that  $x_n = n - \frac{1-\lambda}{\lambda}(1 - (1-\lambda)^n) \geq \frac{1}{\lambda} \frac{1}{2e} - (1 - \frac{1}{e}) \geq \frac{1}{6\lambda}$  for sufficiently  
 619 small  $\lambda$ . Here we used the fact that  $(1-\lambda)^{\frac{1}{\lambda}} \rightarrow e^{-1}$ .

620 Suppose the next cost function is  $f_{n+1}(x) = m'x^2$ . Notice that if the offline adversary simply stays  
 621 at zero throughout the game, the total cost it incurs would be

$$\text{cost}(ADV) = \frac{m}{2}(1^2 + 2^2 + \dots + n^2) \leq \frac{mn^3}{2} = \Theta\left(\frac{m}{\lambda^3}\right) = \Theta\left(\frac{1}{\sqrt{\gamma^3 m}}\right).$$

622 In the last step, we used the fact that  $\lambda$  tends to  $\sqrt{\gamma m}$  when  $\gamma = o(\frac{1}{m})$  and  $m$  tends to zero.

623 If we pick  $m'$  large enough that OBD is forced to incur movement cost at least  $\frac{1}{2}(\frac{x_n}{2})^2$ , the total cost  
 624 incurred by OBD is

$$\text{cost}(OBD) \geq \frac{1}{2}\left(\frac{x_n}{2}\right)^2 = \Theta\left(\frac{1}{\lambda^2}\right) = \Theta\left(\frac{1}{\gamma m}\right).$$

625 Putting these facts together, we see that the competitive ratio is at least  $\Theta(\sqrt{\frac{\gamma}{m}})$ .  $\square$

626 The last technical lemma used to proof Theorem 2 is the following.

627 **Lemma 11.** *When  $\gamma = \Omega(\frac{1}{m})$ , the competitive ratio of OBD is  $\Omega(\frac{1}{m})$ .*

628 *Proof.* Since  $\gamma = \Omega(\frac{1}{m})$ , we can assume there exists  $C > 0$  such that  $\gamma \geq C/m$ . We again  
 629 consider a situation such that the OBD algorithm moves far away from the starting point, incurring  
 630 significant movement cost, whereas the offline adversary could pay relatively little cost by staying at  
 631 the starting point. More specifically, suppose the starting point is zero and the first cost function is  
 632  $f_1(x) = \frac{m}{2}(1-x)^2$ . Suppose the adversary stays at zero. The cost incurred by the adversary will be

$$\text{cost}(ADV) = \frac{m}{2}.$$

633 Notice that by the balance condition ( $M_t = \gamma H_t$ ), the point  $x_1$  picked by OBD satisfies  $\frac{x_1^2}{2} =$   
 634  $\gamma \frac{m}{2}(1-x_1)^2$ . So the cost incurred by OBD is lower bounded by

$$\text{cost}(OBD) \geq M_1 = \frac{1}{2}\left(\frac{\sqrt{\gamma m}}{1 + \sqrt{\gamma m}}\right)^2 \geq \frac{1}{2}\left(\frac{\sqrt{C}}{1 + \sqrt{C}}\right)^2.$$

635 Since  $C$  is a positive constant, the competitive ratio of OBD is lower bounded by  $\frac{OBD}{ADV} = \Theta(\frac{1}{m})$ .  $\square$

636 Now we return to the proof of Theorem 2. This proof is a straightforward combination of the above  
 637 lemmas. When  $\gamma = o(\frac{1}{m})$ , by combining Lemma 8 and Lemma 10, we know the competitive  
 638 ratio is at least  $\max\left(\frac{C_1}{\gamma m}, C_2 \sqrt{\frac{\gamma}{m}}\right)$  for some positive constants  $C_1, C_2$ . Notice that function  $\frac{C_1}{\gamma m}$  is  
 639 monotonically decreasing in  $\gamma$  and  $C_2 \sqrt{\frac{\gamma}{m}}$  is monotonically increasing in  $\gamma$ . Solving the equation  
 640  $\frac{C_1}{\gamma m} = C_2 \sqrt{\frac{\gamma}{m}}$ , we get  $\gamma = \left(\frac{C_1}{C_2}\right)^{\frac{2}{3}} m^{-\frac{1}{3}}$ . Therefore we see that

$$\max\left\{\frac{C_1}{\gamma m}, C_2 \sqrt{\frac{\gamma}{m}}\right\} \geq C_1^{\frac{1}{3}} C_2^{\frac{2}{3}} m^{-\frac{2}{3}} = \Theta(m^{-\frac{2}{3}}).$$

641 On the other hand, when  $\gamma = \Omega(\frac{1}{m})$ , by Lemma 11, we know the competitive ratio of OBD is lower  
 642 bounded by  $\Theta(\frac{1}{m})$ .

643 Together, the above implies that the competitive ratio of OBD is at least  $\Theta(m^{-\frac{2}{3}})$  when  $m \rightarrow 0^+$ .



### 644 C Proof of Theorem 3

645 To begin, note that it is sufficient to prove result for all positive  $m \leq \frac{9}{64}$ . Similarly, it also suffices  
 646 to show Theorem 3 when the minimum of every hitting cost function is zero, since otherwise the  
 647 competitive ratio can only improve if this is not the case.

648 Our argument makes use of the following potential function:  $\phi(x_t, x_t^*) = \eta \|x_t - x_t^*\|^2$ . We define  
 649  $\Delta\phi = \phi(x_t, x_t^*) - \phi(x_{t-1}, x_{t-1}^*)$  and  $\Delta\phi' = \phi(x'_t, x_t^*) - \phi(x_{t-1}, x_{t-1}^*)$ . It suffices to show that  
 650  $H_t + M_t + \Delta\phi \leq C(H_t^* + M_t^*)$ , for some positive constant  $C$ . From this inequality, we can sum  
 651 over all timesteps  $t$  to yield that the competitive ratio is upper bounded by  $C$ :

$$\sum_{t=0}^T H_t + M_t \leq \sum_{t=0}^T H_t + M_t + \Delta\phi \leq C \sum_{t=0}^T (H_t^* + M_t^*).$$

652 Throughout the proof, we fix  $\eta = 4$  and use  $\|\cdot\|$  to denote  $\ell_2$  norm. When we refer to generalized  
 653 mean inequality, we mean

$$(a + b)^2 \leq 2a^2 + 2b^2, \forall a, b \in \mathbb{R}.$$

654 We define  $H'_t := f_t(x'_t)$  and  $M'_t := c(x'_t, x_{t-1}) = \frac{1}{2} \|x'_t - x_{t-1}\|_2^2$ , where  $x'_t$  is the point chosen by  
 655 the first OBD phase (line 3) of Algorithm 2.

656 Before we move to the main casework in the proof, we begin with a technical lemma that we use to  
 657 bound the change in the potential function.

658 **Lemma 12.** Suppose the potential function  $\phi : \mathbb{R}^d \times \mathbb{R}^d \rightarrow \mathbb{R}_{\geq 0}$  is defined as  $\phi(a, b) = \eta \|a - b\|^2$ ,  
 659 where  $\eta > 0$ . Then  $\forall \lambda > 0$ , the change in potential satisfies

$$\phi(a, c) - \phi(a, b) \leq (1 + \lambda^2)\phi(b, c) + \frac{1}{\lambda^2}\phi(a, b),$$

660 for all  $a, b, c \in \mathbb{R}^d$ .

661 *Proof.* Using the triangle inequality, we obtain

$$\|a - c\|^2 \leq (\|a - b\| + \|b - c\|)^2 = \|a - b\|^2 + \|b - c\|^2 + 2\|a - b\|\|b - c\|.$$

662 Rearranging the terms, we obtain

$$\begin{aligned} \|a - c\|^2 - \|a - b\|^2 &\leq \|b - c\|^2 + 2\|a - b\|\|b - c\| \\ &= \|b - c\|^2 + 2\left(\frac{1}{\lambda}\|a - b\|\right)(\lambda\|b - c\|) \\ &\leq (1 + \lambda^2)\|b - c\|^2 + \frac{1}{\lambda^2}\|a - b\|^2, \end{aligned}$$

663 where in the last line we use the AM-GM inequality. □

664 We are now ready to precede with the proof, which is divided up into two cases based on the  
 665 relationship between the hitting cost of the algorithm and that of the adversary.

666 **Case 1:**  $H'_t \leq H_t^*$

667 Since the hitting cost function satisfies  $f_t(x) \geq \frac{m}{2} \|x - v_t\|^2$ , by the triangle inequality, we have

$$\|x'_t - x_t^*\| \leq \|x'_t - v_t\| + \|x_t^* - v_t\| \leq \left( \sqrt{\frac{2H'_t}{m}} + \sqrt{\frac{2H_t^*}{m}} \right). \quad (10)$$

668 Thus the change in potential satisfies

$$\begin{aligned}
\frac{1}{\eta} \Delta \phi' &= \|x'_t - x_t^*\|^2 - \|x_{t-1} - x_{t-1}^*\|^2 \\
&= (\|x'_t - x_t^*\| - \|x_{t-1} - x_{t-1}^*\|)(\|x'_t - x_t^*\| + \|x_{t-1} - x_{t-1}^*\|) \\
&\leq (\|x'_t - x_{t-1}\| + \|x_t^* - x_{t-1}^*\|)(\|x'_t - x_{t-1}\| + \|x_t^* - x_{t-1}^*\| + 2\|x'_t - x_t^*\|) \quad (11a) \\
&= (\|x'_t - x_{t-1}\| + \|x_t^* - x_{t-1}^*\|)^2 + 2(\|x'_t - x_{t-1}\| + \|x_t^* - x_{t-1}^*\|)\|x'_t - x_t^*\| \\
&\leq 2\|x'_t - x_{t-1}\|^2 + 2\|x_t^* - x_{t-1}^*\|^2 + 2(\|x'_t - x_{t-1}\| + \|x_t^* - x_{t-1}^*\|)\|x'_t - x_t^*\| \quad (11b) \\
&\leq 4M'_t + 4M_t^* + 2(\sqrt{2M'_t} + \sqrt{2M_t^*}) \left( \sqrt{\frac{2H'_t}{m}} + \sqrt{\frac{2H_t^*}{m}} \right) \quad (11c) \\
&\leq 4M'_t + 4M_t^* + \sqrt{\frac{1}{m}}((\sqrt{2M'_t} + \sqrt{2M_t^*})^2 + (\sqrt{2H'_t} + \sqrt{2H_t^*})^2) \quad (11d) \\
&\leq 4M'_t + 4M_t^* + \sqrt{\frac{1}{m}}((4M'_t + 4M_t^*) + (4H'_t + 4H_t^*)) \quad (11e) \\
&= \left(4 + 4\sqrt{\frac{1}{m}}\right) M'_t + \left(4 + 4\sqrt{\frac{1}{m}}\right) M_t^* + 4\sqrt{\frac{1}{m}} H'_t + 4\sqrt{\frac{1}{m}} H_t^*,
\end{aligned}$$

669 where we use the triangle inequality in line (11a); the generalized mean inequality in lines (11b),  
670 (11d) and (11e) and inequality (10) in line (11c).

671 Using the OBD's balance condition  $M'_t = \gamma H'_t$  and the assumption  $H'_t \leq H_t^*$  based on inequality  
672 (11), we have

$$\begin{aligned}
\frac{1}{\eta} \Delta \phi' &\leq \left(4 + 4\sqrt{\frac{1}{m}}\right) \gamma H'_t + \left(4 + 4\sqrt{\frac{1}{m}}\right) M_t^* + 4\sqrt{\frac{1}{m}} H'_t + 4\sqrt{\frac{1}{m}} H_t^* \\
&\leq \left(4 + 4\sqrt{\frac{1}{m}}\right) \gamma H_t^* + \left(4 + 4\sqrt{\frac{1}{m}}\right) M_t^* + 8\sqrt{\frac{1}{m}} H_t^*.
\end{aligned}$$

673 Notice that by the triangle inequality and the generalized mean inequality, we have that

$$M_t = \frac{1}{2} \|x_t - x_{t-1}\|^2 \leq \frac{1}{2} (\|x'_t - x_{t-1}\| + \|x_t - x'_t\|)^2 \leq \frac{1}{2} (2\|x'_t - x_{t-1}\|^2 + 2\|x_t - x'_t\|^2).$$

Remember that since  $\mu = 1$ , we have  $\|x_t - x'_t\|^2 = m \|x'_t - v_t\|^2$ . Using this fact, we derive the following bound on  $H_t + M_t + \Delta\phi$ :

$$\begin{aligned} H_t + M_t + \Delta\phi &\leq H'_t + \frac{1}{2} \left( 2 \|x'_t - x_{t-1}\|^2 + 2 \|x_t - x'_t\|^2 \right) \\ &\quad + \eta (\|x_t - x_t^*\|^2 - \|x'_t - x_t^*\|^2) + \Delta\phi' \\ &\leq H'_t + (2M'_t + m \|x'_t - v_t\|^2) \\ &\quad + \left( \eta \left( 1 + \frac{1}{\sqrt{m}} \right) \|x_t - x'_t\|^2 + \eta\sqrt{m} \|x'_t - x_t^*\|^2 \right) + \Delta\phi' \end{aligned} \quad (12a)$$

$$\begin{aligned} &\leq H'_t + (2M'_t + m \|x'_t - v_t\|^2) \\ &\quad + \left( \eta \left( 1 + \frac{1}{\sqrt{m}} \right) m \|x'_t - v_t\|^2 + \eta\sqrt{m} \left( 2 \|x'_t - v_t\|^2 + 2 \|x_t^* - v_t\|^2 \right) \right) \\ &\quad + \Delta\phi' \end{aligned} \quad (12b)$$

$$\begin{aligned} &\leq H'_t + (2M'_t + 2H'_t) + \left( \eta \left( 1 + \frac{1}{\sqrt{m}} \right) 2H'_t + \eta\sqrt{m} \left( \frac{4H'_t}{m} + \frac{4H_t^*}{m} \right) \right) + \Delta\phi' \end{aligned} \quad (12c)$$

$$\begin{aligned} &= (3 + 2\eta + \frac{6\eta}{\sqrt{m}})H'_t + 2M'_t + 4\eta \frac{H_t^*}{\sqrt{m}} + \Delta\phi' \\ &= \left( 3 + 2\eta + \frac{6\eta}{\sqrt{m}} + 2\gamma \right) H'_t + 4\eta \frac{H_t^*}{\sqrt{m}} + \Delta\phi' \\ &\leq \left( 3 + 2\eta + \frac{6\eta}{\sqrt{m}} + 2\gamma \right) H_t^* + 4\eta \frac{H_t^*}{\sqrt{m}} + \Delta\phi' \\ &= \left( 3 + 2\eta + \frac{10\eta}{\sqrt{m}} + 2\gamma \right) H_t^* + \Delta\phi', \end{aligned} \quad (12d)$$

where we use Lemma 12 in line (12a); the triangle inequality in line (12b);  $m$ -strongly convexity of  $f_t$  in line (12c); and the assumption  $H'_t \leq H_t^*$  in line (12d).

Combining inequalities (11) and (12), we obtain

$$H_t + M_t + \Delta\phi \leq (3 + 2\eta + 2\gamma + 4\eta\gamma + \frac{\eta}{\sqrt{m}}(18 + 4\gamma))H_t^* + \eta(4 + 4\sqrt{\frac{1}{m}})M_t^*. \quad (13)$$

**Case 2:**  $H'_t \geq H_t^*$

In this case, we prove that for any  $x_t^*, x_{t-1}^* \in \mathbb{R}^d$ , we have

$$H_t + M_t + \Delta\phi \leq \frac{C}{\sqrt{m}}(H_t^* + M_t^*), \quad (14)$$

for some positive constant  $C$ .

In the proof, we use  $D_1, D_2, \dots, D_d$  to represent the  $d$  axes in the coordinate system.

As shown in Figure 4, without loss of generality, let  $v_t = (0, 0, \dots, 0)$ ,  $x'_t = (h_1, h_2, 0, \dots, 0)$  and  $D_2 = h_2$  be the projection hyper plane, where  $h_1 \geq 0, h_2 \geq 0$ . And let  $l = \|x_{t-1} - x'_t\| > 0$ . Note that our analysis still holds in one-dimension because we can restrict ourselves to the  $D_2$  axis.

Then we know  $x_{t-1} = (h_1, h_2 + l, 0, \dots, 0)$ ,  $x_t = (h_1(1 - \sqrt{m}), h_2(1 - \sqrt{m}), 0, \dots, 0)$ . Since we know  $x_t^*$  must lie below the projection hyper plane, we can let  $x_t^* = (x, h_2 - y, a_3, a_4, \dots, a_d)$ , where  $y > 0$ .

Now we show that it suffices to prove the statement when  $x_{t-1}^*$  is on the line segment  $x_t^*x_{t-1}$ . Suppose  $x_{t-1}^*$  is not on the line segment  $x_t^*x_{t-1}$ . If  $\|x_{t-1}^* - x_{t-1}\| > \|x_t^* - x_{t-1}\|$ , by moving  $x_{t-1}^*$  to  $x_t^*$ ,  $\Delta\phi$  increases and  $M_t^*$  decreases. Otherwise, we can choose a point  $K$  on line segment  $x_t^*x_{t-1}$  such that  $\|K - x_{t-1}\| = \|x_{t-1}^* - x_{t-1}\|$ . By moving  $x_{t-1}^*$  to  $K$ ,  $\Delta\phi$  remains unchanged and  $M_t^*$  decreases. Therefore if inequality (14) holds for  $x_{t-1}^*$  on the segment  $x_t^*x_{t-1}$ , then it must also hold for any other  $x_{t-1}^* \in \mathbb{R}^d$ .

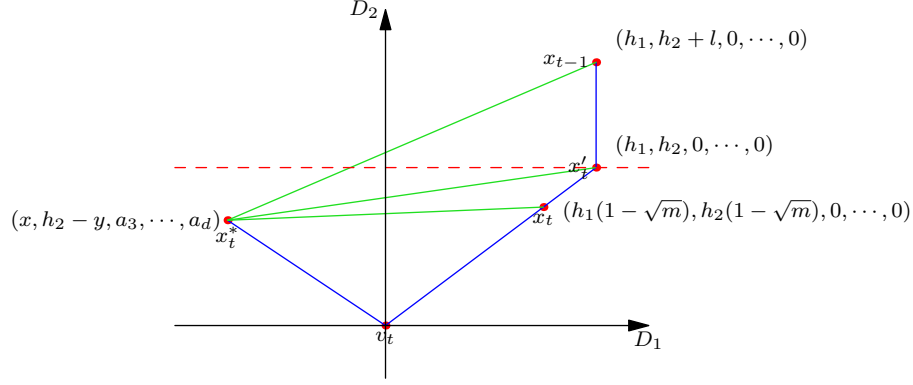

Figure 4: Starting at  $x_{t-1}$ ,  $G$ -OBD first does projection on to the  $H'_t$  level set (red dashed line) in the first phase. The projection point is  $x'_t$ . Then  $G$ -OBD moves toward the minimizer to obtain point  $x_t$  in the second phase. Let the minimizer  $v_t$  be the origin. Notice that the three points  $x_{t-1}$ ,  $x'_t$ ,  $v_t$  defines a plane  $S$ . Without loss of generality, we can let axis  $D_2$  be parallel to line  $x'_t x_{t-1}$ ; and let axis  $D_1$  be parallel to the projection hyperplane.

Now we suppose  $x_{t-1}^*$  is on the line segment  $x_t^* x_{t-1}$ , and  $\|x_t^* - x_{t-1}^*\| = \lambda \|x_t^* - x_{t-1}\|$ .

Recall that we set  $\gamma = 1$ , so  $M'_t = \gamma H'_t = H'_t$ . It follows that

$$M_t \leq l^2 + \|x_t - x'_t\|^2 = l^2 + m(h_1^2 + h_2^2) \leq l^2 + 2H'_t = l^2 + 2M'_t \leq 2l^2,$$

and

$$H_t \leq H'_t = M'_t = \frac{l^2}{2}.$$

We can separate  $\Delta\phi$  into two parts:

$$\frac{\Delta\phi}{\eta} = \left( \|x_t^* - x_t\|^2 - \|x_t^* - x_{t-1}\|^2 \right) + \left( \|x_t^* - x_{t-1}\|^2 - \|x_{t-1}^* - x_{t-1}\|^2 \right).$$

For convenience, we define

$$\Delta\phi_1 := \left( \|x_t^* - x_t\|^2 - \|x_t^* - x_{t-1}\|^2 \right),$$

and

$$\Delta\phi_2 := \left( \|x_t^* - x_{t-1}\|^2 - \|x_{t-1}^* - x_{t-1}\|^2 \right).$$

We further notice that from the triangle inequality,

$$\Delta\phi_2 \leq (1 - (1 - \lambda)^2) \|x_t^* - x_{t-1}\|^2 = \lambda(2 - \lambda) \left( (x - h_1)^2 + (y + l)^2 + \sum_{i=3}^d a_i^2 \right). \quad (15)$$

Now we express  $M_t^*$  and  $H_t^*$  in terms of the variables we define, which are

$$M_t^* = \frac{1}{2} (\lambda \|x_t^* - x_{t-1}\|)^2 = \frac{\lambda^2}{2} \left( (x - h_1)^2 + (y + l)^2 + \sum_{i=3}^d a_i^2 \right), \quad (16)$$

and

$$H_t^* \geq \frac{m}{2} \|x_t^* - v_t\|^2 = \frac{m}{2} \left( x^2 + (h_2 - y)^2 + \sum_{i=3}^d a_i^2 \right). \quad (17)$$

We also expand  $\Delta\phi_1$ :

$$\begin{aligned} \Delta\phi_1 &= \|x_t^* - x_t\|^2 - \|x_t^* - x_{t-1}\|^2 \\ &= (x - h_1 + h_1\sqrt{m})^2 + (y - h_2\sqrt{m})^2 + \sum_{i=3}^d a_i^2 - (x - h_1)^2 - (y + l)^2 - \sum_{i=3}^d a_i^2 \\ &= ((x - h_1 + h_1\sqrt{m})^2 - (x - h_1)^2) + ((y - h_2\sqrt{m})^2 - (y + l)^2) \\ &= h_1\sqrt{m}(2x - 2h_1 + h_1\sqrt{m}) - (h_2\sqrt{m} + l)(2y + l - h_2\sqrt{m}) \\ &= 2xh_1\sqrt{m} - 2h_1^2\sqrt{m} + h_1^2m - 2y(h_2\sqrt{m} + l) - l^2 + h_2^2m. \end{aligned} \quad (18)$$

705 Using the condition that  $m \leq \frac{9}{64} < 1$ , we derive the following bound:

$$\begin{aligned}\Delta\phi_1 &\leq 2xh_1\sqrt{m} - 2h_1^2\sqrt{m} + h_1^2m - 2y(h_2\sqrt{m} + l) - l^2 + h_2^2\sqrt{m} \\ &= 2xh_1\sqrt{m} - 2h_1^2\sqrt{m} + h_1^2m + \sqrt{m}(h_2 - y)^2 - \sqrt{m}y^2 - 2yl - l^2.\end{aligned}\quad (19)$$

706 Substituting equations (16) and (17) into inequality (14), we know that it suffices to show that for  
707 some constant  $C$ ,

$$M_t + H_t + \eta\Delta\phi_1 + \eta\Delta\phi_2 \leq \frac{C}{\sqrt{m}} \left( \frac{m}{2} \left( x^2 + (h_2 - y)^2 + \sum_{i=3}^d a_i^2 \right) + \frac{\lambda^2}{2} \left( (x - h_1)^2 + (y + l)^2 + \sum_{i=3}^d a_i^2 \right) \right). \quad (20)$$

708 **Subcase 2.1:**  $\lambda \leq \frac{\sqrt{m}}{2}$

709 We can bound equation (15) as follows:

$$\begin{aligned}\Delta\phi_2 &= \lambda(2 - \lambda) \left( (x - h_1)^2 + (y + l)^2 + \sum_{i=3}^d a_i^2 \right) \\ &\leq \sqrt{m}(x - h_1)^2 + \sqrt{m}(y + l)^2 + \sqrt{m} \sum_{i=3}^d a_i^2 \\ &= \sqrt{m}x^2 - 2\sqrt{m}xh_1 + \sqrt{m}h_1^2 + \sqrt{m}y^2 + 2\sqrt{m}yl + \sqrt{m}l^2 + \sqrt{m} \sum_{i=3}^d a_i^2.\end{aligned}\quad (21)$$

710 Summing inequalities (19) and (21), we get

$$\begin{aligned}\Delta\phi_1 + \Delta\phi_2 &\leq \sqrt{m}x^2 + (-h_1^2\sqrt{m} + h_1^2m) + \sqrt{m}(h_2 - y)^2 \\ &\quad + (2\sqrt{m}yl - 2yl) + (\sqrt{m}l^2 - l^2) + \sqrt{m} \sum_{i=3}^d a_i^2 \\ &\leq \sqrt{m}x^2 + 0 + \sqrt{m}(h_2 - y)^2 + 0 - \frac{5}{8}l^2 + \sqrt{m} \sum_{i=3}^d a_i^2 \\ &\leq \sqrt{m}x^2 + \sqrt{m}(h_2 - y)^2 - \frac{5}{8}l^2 + \sqrt{m} \sum_{i=3}^d a_i^2,\end{aligned}\quad (22a)$$

711 where we use the condition that  $m \leq \frac{9}{64}$  in line (22a). We further obtain

$$\begin{aligned}M_t + H_t + \eta(\Delta\phi_1 + \Delta\phi_2) &\leq 2l^2 + \frac{l^2}{2} + \eta \left( \sqrt{m}x^2 + \sqrt{m}(h_2 - y)^2 - \frac{5}{8}l^2 + \sqrt{m} \sum_{i=3}^d a_i^2 \right) \\ &= \frac{5l^2}{2} + 4 \left( \sqrt{m}x^2 + \sqrt{m}(h_2 - y)^2 - \frac{5}{8}l^2 + \sqrt{m} \sum_{i=3}^d a_i^2 \right) \\ &= 4 \left( \sqrt{m}x^2 + \sqrt{m}(h_2 - y)^2 + \sqrt{m} \sum_{i=3}^d a_i^2 \right).\end{aligned}$$

712 Therefore, for  $C \geq 8$ , we have

$$M_t + H_t + \eta\Delta\phi_1 + \eta\Delta\phi_2 \leq \frac{C}{\sqrt{m}} \left( \frac{m}{2} \left( x^2 + (h_2 - y)^2 + \sum_{i=3}^d a_i^2 \right) + \frac{\lambda^2}{2} \left( (x - h_1)^2 + (y + l)^2 + \sum_{i=3}^d a_i^2 \right) \right),$$

713 which establishes inequality (20).

714 **Subcase 2.2:**  $\lambda \geq \frac{\sqrt{m}}{2}$

715 Notice that when  $C \geq 32$ , we have

$$\frac{C}{2\sqrt{m}}\lambda^2 \geq \frac{16}{\sqrt{m}}\lambda^2 \geq \frac{16}{\sqrt{m}} \cdot \frac{\sqrt{m}}{2}\lambda = 8\lambda \geq 4\lambda(2-\lambda) = \eta\lambda(2-\lambda).$$

716 Substituting this inequality into equation (15), we know that for  $C \geq 32$ ,

$$\eta\Delta\phi_2 \leq \frac{C}{\sqrt{m}} \cdot \frac{\lambda^2}{2} \left( (x-h_1)^2 + (y+l)^2 + \sum_{i=3}^d a_i^2 \right). \quad (23)$$

717 We can further bound inequality (19):

$$\begin{aligned} \Delta\phi_1 &\leq 2xh_1\sqrt{m} - 2h_1^2\sqrt{m} + h_1^2m + \sqrt{m}(h_2-y)^2 - \sqrt{m}y^2 - 2yl - l^2 \\ &\leq \sqrt{m}x^2 + \sqrt{m}h_1^2 - 2h_1^2\sqrt{m} + h_1^2m + \sqrt{m}(h_2-y)^2 - l^2 \\ &\leq \sqrt{m}x^2 + \sqrt{m}(h_2-y)^2 - l^2, \end{aligned}$$

718 where we apply the AM-GM inequality in step 2 and use the condition  $m < 1$  in step 3.

719 Therefore we have

$$\begin{aligned} H_t + M_t + \eta\Delta\phi_1 &\leq \frac{5l^2}{2} + 4(\sqrt{m}x^2 + \sqrt{m}(h_2-y)^2 - l^2) \\ &\leq 4(\sqrt{m}x^2 + \sqrt{m}(h_2-y)^2). \end{aligned} \quad (24)$$

720 Summing inequalities (24) and (23), we yield that for  $C \geq 32$ ,

$$M_t + H_t + \eta\Delta\phi_1 + \eta\Delta\phi_2 \leq \frac{C}{\sqrt{m}} \left( \frac{m}{2} (x^2 + (h_2-y)^2 + \sum_{i=3}^d a_i^2) + \frac{\lambda^2}{2} ((x-h_1)^2 + (y+l)^2 + \sum_{i=3}^d a_i^2) \right),$$

721 which establishes inequality (20).

722 Combining all cases above, we conclude that G-OBd is an  $O(\frac{1}{\sqrt{m}})$ -competitive algorithm.

## 723 **D Proof of Theorem 4**

724 To prove Theorem 4 we make use of Lemma 1 and 5.

725 Our approach is to make use of strong convexity and properties of Bregman Divergences to derive an  
726 inequality in the form of  $H_t + M_t + \Delta\phi \leq C(H_t^* + M_t^*)$  for some positive constant  $C$ , where  $\Delta\phi$   
727 is the change in potential, which we will define later. The constant  $C$  is then an upper bound for the  
728 competitive ratio.

729 To begin, recall that  $h$  is assumed to be  $\alpha$ -strongly convex and  $\beta$ -strongly smooth with respect to  
730 norm  $\|\cdot\|$ . Thus we can give a trivial bound on Bregman Divergence, namely

$$\forall x, y, \frac{\alpha}{2} \|x - y\|^2 \leq D_h(x||y) \leq \frac{\beta}{2} \|x - y\|^2. \quad (25)$$

731 Recall that the update rule in Algorithm 3 can be stated as:

$$x_t = \arg \min_x f_t(x) + \lambda_1 D_h(x||x_{t-1}) + \lambda_2 D_h(x||v_t).$$

732 Since the function  $f_t(x) + \lambda_1 D_h(x||x_{t-1}) + \lambda_2 D_h(x||v_t)$  is strongly convex, the minimizer  $x_t$  exists  
733 and is unique. Furthermore, it must satisfy the first-order condition

$$\nabla f_t(x_t) + \lambda_1(\nabla h(x_t) - \nabla h(x_{t-1})) + \lambda_2(\nabla h(x_t) - \nabla h(v_t)) = 0.$$

734 Further, since  $f_t(x)$  is  $m$ -strongly convex, we have

$$\begin{aligned} f_t(x_t^*) &\geq f_t(x_t) + \langle \nabla f_t(x_t), x_t^* - x_t \rangle + \frac{m}{2} \|x_t^* - x_t\|^2 \\ &= f_t(x_t) - \lambda_1 \langle \nabla h(x_{t-1}) - \nabla h(x_t), x_t - x_t^* \rangle \\ &\quad - \lambda_2 \langle \nabla h(v_t) - \nabla h(x_t), x_t - x_t^* \rangle + \frac{m}{2} \|x_t^* - x_t\|^2. \end{aligned} \quad (26)$$

Using Lemma 5, we obtain

$$\langle \nabla h(x_{t-1}) - \nabla h(x_t), x_t - x_t^* \rangle = D_h(x_t^* || x_{t-1}) - D_h(x_t^* || x_t) - D_h(x_t || x_{t-1}),$$

and

$$\langle \nabla h(v_t) - \nabla h(x_t), x_t - x_t^* \rangle = D_h(x_t^* || v_t) - D_h(x_t^* || x_t) - D_h(x_t || v_t).$$

Substituting the two above identities into inequality (26), we get

$$\begin{aligned} & f_t(x_t) + \lambda_1 D_h(x_t || x_{t-1}) + \lambda_2 D_h(x_t || v_t) + (\lambda_1 + \lambda_2) D_h(x_t^* || x_t) + \frac{m}{2} \|x_t^* - x_t\|^2 \\ & \leq f_t(x_t^*) + \lambda_1 D_h(x_t^* || x_{t-1}) + \lambda_2 D_h(x_t^* || v_t). \end{aligned}$$

It follows that

$$\begin{aligned} & f_t(x_t) + \lambda_1 D_h(x_t || x_{t-1}) + (\lambda_1 + \lambda_2) D_h(x_t^* || x_t) + \frac{m}{2} \|x_t^* - x_t\|^2 \\ & \leq f_t(x_t^*) + \lambda_1 D_h(x_t^* || x_{t-1}) + \lambda_2 D_h(x_t^* || v_t). \end{aligned} \quad (27)$$

We define the potential function as  $\phi(x_t, x_t^*) = (\lambda_1 + \lambda_2) D_h(x_t^* || x_t) + \frac{m}{2} \|x_t^* - x_t\|^2$ , and let  $\Delta\phi = \phi(x_t, x_t^*) - \phi(x_{t-1}, x_{t-1}^*)$ . Applying this notation to inequality (27) and rearranging terms, we obtain

$$\begin{aligned} & H_t + \lambda_1 M_t + \Delta\phi \\ & \leq (H_t^* + \lambda_2 D_h(x_t^* || v_t)) + \lambda_1 D_h(x_t^* || x_{t-1}) - (\lambda_1 + \lambda_2) D_h(x_{t-1}^* || x_{t-1}) - \frac{m}{2} \|x_{t-1}^* - x_{t-1}\|^2. \end{aligned} \quad (28)$$

Using Lemma 1, we get

$$\frac{1}{2\beta} \|\nabla h(x_{t-1}) - \nabla h(x_{t-1}^*)\|_*^2 \leq D_h(x_{t-1}^* || x_{t-1}), \quad (29)$$

and

$$\|\nabla h(x_{t-1}) - \nabla h(x_{t-1}^*)\|_* \leq \beta \|x_{t-1} - x_{t-1}^*\|. \quad (30)$$

Using Lemma 5 and the two above inequalities, we get

$$\begin{aligned} & \lambda_1 D_h(x_t^* || x_{t-1}) - (\lambda_1 + \lambda_2) D_h(x_{t-1}^* || x_{t-1}) - \frac{m}{2} \|x_{t-1}^* - x_{t-1}\|^2 \\ & = \lambda_1 (D_h(x_t^* || x_{t-1}) - D_h(x_{t-1}^* || x_{t-1})) - \lambda_2 D_h(x_{t-1}^* || x_{t-1}) - \frac{m}{2} \|x_{t-1}^* - x_{t-1}\|^2 \end{aligned} \quad (31a)$$

$$\begin{aligned} & = \lambda_1 D_h(x_t^* || x_{t-1}^*) + \lambda_1 \langle \nabla h(x_{t-1}) - \nabla h(x_{t-1}^*), x_{t-1}^* - x_t^* \rangle \\ & \quad - \lambda_2 D_h(x_{t-1}^* || x_{t-1}) - \frac{m}{2} \|x_{t-1}^* - x_{t-1}\|^2 \end{aligned} \quad (31b)$$

$$\begin{aligned} & \leq \lambda_1 D_h(x_t^* || x_{t-1}^*) + \lambda_1 \|\nabla h(x_{t-1}) - \nabla h(x_{t-1}^*)\|_* \|x_{t-1}^* - x_t^*\| \\ & \quad - \lambda_2 D_h(x_{t-1}^* || x_{t-1}) - \frac{m}{2} \|x_{t-1}^* - x_{t-1}\|^2 \end{aligned} \quad (31c)$$

$$\begin{aligned} & \leq \lambda_1 D_h(x_t^* || x_{t-1}^*) + \frac{\lambda_2 \beta + m}{2\beta^2} \|\nabla h(x_{t-1}) - \nabla h(x_{t-1}^*)\|_*^2 + \frac{\lambda_1^2 \beta^2}{2(\lambda_2 \beta + m)} \|x_{t-1}^* - x_t^*\|^2 \\ & \quad - \lambda_2 D_h(x_{t-1}^* || x_{t-1}) - \frac{m}{2} \|x_{t-1}^* - x_{t-1}\|^2 \\ & = \lambda_1 D_h(x_t^* || x_{t-1}^*) + \frac{\lambda_1^2 \beta^2}{2(\lambda_2 \beta + m)} \|x_{t-1}^* - x_t^*\|^2 \\ & \quad + \left( \frac{\lambda_2}{2\beta} \|\nabla h(x_{t-1}) - \nabla h(x_{t-1}^*)\|_*^2 - \lambda_2 D_h(x_{t-1}^* || x_{t-1}) \right) \\ & \quad + \left( \frac{m}{2\beta^2} \|\nabla h(x_{t-1}) - \nabla h(x_{t-1}^*)\|_*^2 - \frac{m}{2} \|x_{t-1}^* - x_{t-1}\|^2 \right) \end{aligned} \quad (31d)$$

$$\begin{aligned} & \leq \lambda_1 D_h(x_t^* || x_{t-1}^*) + \frac{\lambda_1^2 \beta^2}{2(\lambda_2 \beta + m)} \|x_{t-1}^* - x_t^*\|^2 \\ & \leq \lambda_1 \left( 1 + \frac{\lambda_1 \beta^2}{\alpha(\lambda_2 \beta + m)} \right) D_h(x_t^* || x_{t-1}^*), \end{aligned} \quad (31e)$$

745 where we use Lemma 5 in line (31a); Cauchy-Schwartz inequality in line (31b); the AM-GM  
 746 inequality in the line (31c); inequalities (29) and (30) in line (31d); and inequality (25) in line (31e).  
 747 Substituting inequality (31) into inequality (28), we obtain

$$H_t + \lambda_1 M_t + \Delta\phi \leq (H_t^* + \lambda_2 D_h(x_t^* || v_t)) + \lambda_1 \left(1 + \frac{\lambda_1 \beta^2}{\alpha(\lambda_2 \beta + m)}\right) M_t^*.$$

748 Using inequality (25) and the fact that  $f_t$  is  $m$ -strongly convex, we obtain

$$\lambda_2 D_h(x_t^* || v_t) \leq \frac{\lambda_2 \beta}{2} \|x_t^* - v_t\|^2 \leq \frac{\lambda_2 \beta}{m} H_t^*.$$

749 Therefore we have

$$H_t + \lambda_1 M_t + \Delta\phi \leq (1 + \frac{\lambda_2 \beta}{m}) H_t^* + \lambda_1 \left(1 + \frac{\lambda_1 \beta^2}{\alpha(\lambda_2 \beta + m)}\right) M_t^*.$$

750 Since  $0 < \lambda_1 \leq 1$ , we have

$$H_t + M_t + \frac{1}{\lambda_1} \Delta\phi \leq \frac{H_t + \lambda_1 M_t + \Delta\phi}{\lambda_1} \leq \frac{m + \lambda_2 \beta}{m \lambda_1} H_t^* + \left(1 + \frac{\beta^2}{\alpha} \cdot \frac{\lambda_1}{\lambda_2 \beta + m}\right) M_t^*.$$

751 Theorem 4 follows from summing the above inequality over all timesteps  $t$ .

## 752 E R-OBD with Squared $\ell_2$ Norm

753 When  $h(x) = \frac{1}{2} \|x\|_2^2$ , the Bregman Divergence  $D_h(x || y)$  is equal to the squared  $\ell_2$  norm  $\frac{1}{2} \|x - y\|_2^2$ .  
 754 Hence, setting  $h(x) = \frac{1}{2} \|x\|_2^2$  in Algorithm 3 gives us R-OBD in the squared  $\ell_2$  setting. In this  
 755 section, we present a separate proof of Regularized OBD with squared  $\ell_2$  norm, in order to remove  
 756 the assumption that the hitting costs  $\{f_t\}$  are differentiable.

757 **Theorem 7.** Consider hitting cost functions that are  $m$ -strongly convex with respect to  $\ell_2$  norm and  
 758 movement costs given by  $\frac{1}{2} \|x_t - x_{t-1}\|_2^2$ . There exists a choice  $\lambda_1, \lambda_2$  such that the competitive ratio  
 759 of Regularized OBD matches the lower bound proved in Theorem 1, i.e. the competitive ratio is at  
 760 most  $\frac{1}{2} \left(1 + \sqrt{1 + \frac{4}{m}}\right)$ .

761 This result follows from the more general bound in Theorem 8 below, which describes the competitive  
 762 ratio of Algorithm 3 as a function of  $\lambda_1, \lambda_2$ .

763 **Theorem 8.** Consider hitting cost functions that are  $m$ -strongly convex with respect to  $\ell_2$  norm and  
 764 movement costs given by  $\frac{1}{2} \|x_t - x_{t-1}\|_2^2$ . Regularized-OBD (Algorithm 3 with  $h(x) = \frac{1}{2} \|x\|_2^2$ ) with  
 765 parameters  $1 \geq \lambda_1 > 0, \lambda_2 \geq 0$  has competitive ratio at most

$$\max \left( \frac{m + \lambda_2}{\lambda_1} \cdot \frac{1}{m}, 1 + \frac{\lambda_1}{\lambda_2 + m} \right).$$

766 Notice that Theorem 7 follows immediately by setting  $\frac{m + \lambda_2}{\lambda_1} = \frac{m}{2} \left(1 + \sqrt{1 + \frac{4}{m}}\right)$  in Theorem 8.

767 Before proving Theorem 8, we first prove a technical lemma which gives a lower bound of the value  
 768 of hitting cost as a function of the distance to the minimizer.

769 **Lemma 13.** If  $f : \mathcal{X} \rightarrow \mathbb{R}$  is a  $m$ -strongly convex function with respect to some norm  $\|\cdot\|$ , and  $v$  is  
 770 the minimizer of  $f$  (i.e.  $v = \arg \min_{x \in \mathcal{X}} f(x)$ ), then we have  $\forall x \in \mathcal{X}$ ,

$$f(x) \geq f(v) + \frac{m}{2} \|x - v\|^2.$$

771 *Proof.* By the definition of  $m$ -strongly convex, we obtain that  $\forall \alpha \in (0, 1)$ ,

$$f(\alpha x + (1 - \alpha)v) \leq \alpha f(x) + (1 - \alpha)f(v) - \frac{m}{2} \alpha(1 - \alpha) \|x - v\|^2. \quad (32)$$



772 Notice that  $f(v) \leq f(\alpha x + (1-\alpha)v)$ . Combining this with inequality (32), we obtain that  $\forall \alpha \in (0, 1)$ ,

$$f(v) \leq \alpha f(x) + (1-\alpha)f(v) - \frac{m}{2}\alpha(1-\alpha)\|x-v\|^2.$$

773 Rearranging the terms, we observe that  $\forall \alpha \in (0, 1)$ ,

$$f(x) \geq f(v) + \frac{m}{2}(1-\alpha)\|x-v\|^2.$$

774 Therefore

$$f(x) \geq \lim_{\alpha \rightarrow 0^+} \left( f(v) + \frac{m}{2}(1-\alpha)\|x-v\|^2 \right) = f(v) + \frac{m}{2}\|x-v\|^2.$$

775

□

776 Now we return to the proof of Theorem 8.

777 *Proof of Theorem 8.* In the proof, we use the property of strongly convex to derive an inequality in  
 778 the form of  $H_t + M_t + \Delta\phi \leq C(H_t^* + M_t^*)$ , where  $\Delta\phi$  is the change in potential and  $C$  is an upper  
 779 bound for the competitive ratio.

780 Throughout the proof, we use  $\|\cdot\|$  to denote  $\ell_2$  norm.

781 Notice that when  $h(x) = \frac{1}{2}\|x\|^2$ , the update rule in Algorithm 3 is:

$$x_t = \arg \min_x f_t(x) + \frac{\lambda_1}{2}\|x - x_{t-1}\|^2 + \frac{\lambda_2}{2}\|x - v_t\|^2.$$

782 For convenience, we define

$$F_t(x) = f_t(x) + \frac{\lambda_1}{2}\|x - x_{t-1}\|^2 + \frac{\lambda_2}{2}\|x - v_t\|^2.$$

783 Since  $f_t(x)$  is  $m$ -strongly convex,  $\frac{\lambda_1}{2}\|x - x_{t-1}\|^2$  is  $\lambda_1$ -strongly convex, and  $\frac{\lambda_2}{2}\|x - v_t\|^2$  is  $\lambda_2$ -  
 784 strongly convex,  $F_t(x)$  is  $(m + \lambda_1 + \lambda_2)$ -strongly convex. Since  $x_t = \arg \min_x F_t(x)$ , by Lemma  
 785 13, we obtain

$$F_t(x_t^*) \geq F_t(x_t) + \frac{m + \lambda_1 + \lambda_2}{2}\|x_t^* - x_t\|^2,$$

786 which implies

$$\begin{aligned} & H_t + \lambda_1 M_t + \frac{m + \lambda_1 + \lambda_2}{2}\|x_t^* - x_t\|^2 \\ & \leq H_t + \lambda_1 M_t + \frac{\lambda_2}{2}\|x - v_t\|^2 + \frac{m + \lambda_1 + \lambda_2}{2}\|x_t^* - x_t\|^2 \\ & \leq H_t^* + \frac{\lambda_1}{2}\|x_t^* - x_{t-1}\|^2 + \frac{\lambda_2}{2}\|x_t^* - v_t\|^2. \end{aligned} \tag{33}$$

787 We define the potential function as  $\phi(x_t, x_t^*) = \frac{m + \lambda_1 + \lambda_2}{2}\|x_t^* - x_t\|^2$  and  $\Delta\phi = \phi(x_t, x_t^*) -$   
 788  $\phi(x_{t-1}, x_{t-1}^*)$ . We then can rewrite inequality (33) as

$$H_t + \lambda_1 M_t + \Delta\phi \leq \left( H_t^* + \frac{\lambda_2}{2}\|x_t^* - v_t\|^2 \right) + \frac{\lambda_1}{2}\|x_t^* - x_{t-1}\|^2 - \frac{m + \lambda_1 + \lambda_2}{2}\|x_{t-1}^* - x_{t-1}\|^2. \tag{34}$$

789 Additionally

$$\begin{aligned} & \frac{\lambda_1}{2} \|x_t^* - x_{t-1}\|^2 - \frac{m + \lambda_1 + \lambda_2}{2} \|x_{t-1}^* - x_{t-1}\|^2 \\ & \leq \frac{\lambda_1}{2} (\|x_t^* - x_{t-1}^*\| + \|x_{t-1}^* - x_{t-1}\|)^2 - \frac{m + \lambda_1 + \lambda_2}{2} \|x_{t-1}^* - x_{t-1}\|^2 \end{aligned} \quad (35a)$$

$$\begin{aligned} & = \frac{\lambda_1}{2} \|x_t^* - x_{t-1}^*\|^2 + \lambda_1 \|x_t^* - x_{t-1}^*\| \cdot \|x_{t-1}^* - x_{t-1}\| - \frac{m + \lambda_2}{2} \|x_{t-1}^* - x_{t-1}\|^2 \\ & \leq \frac{\lambda_1}{2} \|x_t^* - x_{t-1}^*\|^2 + \frac{\lambda_1^2}{2(m + \lambda_2)} \|x_t^* - x_{t-1}^*\|^2 + \frac{m + \lambda_2}{2} \|x_{t-1}^* - x_{t-1}\|^2 \\ & \quad - \frac{m + \lambda_2}{2} \|x_{t-1}^* - x_{t-1}\|^2 \end{aligned} \quad (35b)$$

$$\begin{aligned} & = \frac{\lambda_1(\lambda_1 + \lambda_2 + m)}{2(\lambda_2 + m)} \|x_{t-1}^* - x_{t-1}^*\|^2 \\ & = \lambda_1 \left( 1 + \frac{\lambda_1}{\lambda_2 + m} \right) M_t^*, \end{aligned}$$

790 where we apply the triangle inequality in line (35a) and AM-GM in line (35b).

791 Combining inequalities (34) and (35), we obtain

$$H_t + \lambda_1 M_t + \Delta\phi \leq \left( H_t^* + \frac{\lambda_2}{2} \|x_t^* - v_t\|^2 \right) + \lambda_1 \left( 1 + \frac{\lambda_1}{\lambda_2 + m} \right) M_t^*. \quad (36)$$

792 And since  $f_t(x)$  is  $m$ -strongly convex, we have

$$\frac{\lambda_2}{2} \|x_t^* - v_t\|^2 \leq \frac{\lambda_2}{m} H_t^*.$$

793 Substituting the above identity into inequality (36) yields

$$H_t + \lambda_1 M_t + \Delta\phi \leq \frac{m + \lambda_2}{m} H_t^* + \lambda_1 \left( 1 + \frac{\lambda_1}{m + \lambda_2} \right) M_t^*. \quad (37)$$

794 Using inequality (37), we obtain

$$H_t + M_t + \frac{1}{\lambda_1} \Delta\phi \leq \frac{H_t + \lambda_1 M_t + \Delta\phi}{\lambda_1} \leq \frac{m + \lambda_2}{\lambda_1 m} H_t^* + \left( 1 + \frac{\lambda_1}{m + \lambda_2} \right) M_t^*.$$

795 Theorem 8 follows from summing the above inequality over all timesteps  $t$ .  $\square$

## 796 **F Proof of Theorem 5**

797 In this proof, we construct counterexamples for two separate cases, based on whether  $\lambda_1$  is larger or  
798 smaller than  $m$ . Recall that  $\lambda_2 = 0$  throughout the proof.

799 **Case 1:**  $\lambda_1 > m$

800 In this case, we show the competitive ratio can be unbounded by proposing a series of identical  
801 hitting cost functions on the real number line. We construct a hitting cost function  $f$  with minimizer  
802  $v$  so that there exists a fixed point  $K \neq v$  (i.e. when  $x_{t-1} = K$  and  $f_t = f$ , the algorithm selects  
803  $x_t = x_{t-1}$ ). Since R-OBD is independent of timestep  $t$ , we can propose  $f_t = f$  for  $t = 1, 2, \dots, T$   
804 and let  $x_0 = K$ . In this scenario, the total cost of R-OBD grows linearly in  $T$ . However, by choosing  
805  $x_1 = x_2 = \dots = x_T = v$ , the total cost incurred by the offline adversary is a constant. Therefore the  
806 competitive ratio of R-OBD will be unbounded.

807 Specifically, consider the hitting cost function

$$f(x) = \begin{cases} \frac{m}{2} (1 - (x + 1)^2) & -1 \leq x \leq 0 \\ \frac{m}{2} x^2 & \text{otherwise} \end{cases}.$$

808 Suppose  $x_{t-1} = -1$ , then R-OBDD will choose  $x_t$  such that

$$x_t = \arg \min_x f(x) + \frac{\lambda_1}{2}(x+1)^2.$$

809 Notice that

$$f(x) + \frac{\lambda_1}{2}(x+1)^2 = \begin{cases} \frac{m}{2} + \frac{\lambda_1-m}{2}(x+1)^2 & -1 \leq x \leq 0 \\ \frac{m}{2}x^2 + \frac{\lambda_1}{2}(x+1)^2 & \text{otherwise} \end{cases}.$$

810 Since  $\lambda_1 > m$ , we see that the quantity above is  $\geq \frac{m}{2}$  for all real  $x$ , where equality only holds when  
811  $x = -1$ . It follows that  $x_t = x_{t-1} = -1 \neq 0 = v$ . Thus  $K = -1$  is a fixed point satisfying the  
812 requirements described as above.

813 **Case 2:**  $\lambda_1 \leq m$

814 We consider a situation such that the R-OBDD algorithm moves far away from the starting point,  
815 incurring significant movement cost, whereas the offline adversary could pay relatively little cost by  
816 staying at the starting point. More specifically, suppose the starting point  $x_0 = 0$  and the first hitting  
817 cost function is  $f_1(x) = \frac{m}{2}(1-x)^2$ . Consider an adversary which chooses  $x_0 = x_1 = \dots = x_T$ .  
818 The cost incurred by the adversary is

$$\text{cost}(ADV) = \frac{m}{2}.$$

819 Using the update rule, the R-OBDD algorithm chooses

$$x_1 = \arg \min_x \frac{m}{2}(1-x)^2 + \frac{\lambda_1}{2}x^2 = \frac{m}{m+\lambda_1} \geq \frac{1}{2}.$$

820 The movement cost incurred by R-OBDD is at least

$$\text{cost}(ALG) \geq M_1 = \frac{1}{2}x_1^2 \geq \frac{1}{8}.$$

821 Thus the competitive ratio is at least

$$\frac{\text{cost}(ALG)}{\text{cost}(ADV)} \geq \frac{1}{4m}.$$

822 Theorem 5 follows from combining these two cases.

## 823 G Proof of Theorem 6

824 Let  $\{x_t^L\}$  be the sequence of points achieving the  $L$ -constrained offline optimal. We first prove an  
825 upper bound on the difference of hitting costs  $f_t(x_t) - f_t(x_t^L)$ , and then use this bound to prove a  
826  $O(G\sqrt{TL})$  upper bound on the regret  $\sum_{t=1}^T (f_t(x_t) - f_t(x_t^L) + c(x_t, x_{t-1})) - \sum_{t=1}^T c(x_t^L, x_{t-1}^L)$ .

827 Since the function  $f_t(x) + \lambda_1 D_h(x||x_{t-1}) + \lambda_2 D_h(x||v_t)$  is strongly convex, it has a unique mini-  
828 mizer, at which point the gradient vanishes. This is the point  $x_t$  which Algorithm 3 picks in round  $t$ .  
829 We can rearrange the vanishing gradient condition to obtain

$$\nabla f_t(x_t) = \lambda_1 (\nabla h(x_{t-1}) - \nabla h(x_t)) + \lambda_2 (\nabla h(v_t) - \nabla h(x_t)).$$

830 Therefore by Lemma 5, we have

$$\begin{aligned} \langle \nabla f_t(x_t), x_t - x_t^L \rangle &= \lambda_1 \langle \nabla h(x_{t-1}) - \nabla h(x_t), x_t - x_t^L \rangle + \lambda_2 \langle \nabla h(v_t) - \nabla h(x_t), x_t - x_t^L \rangle \\ &= \lambda_1 (D_h(x_t^L||x_{t-1}) - D_h(x_t^L||x_t) - D_h(x_t||x_{t-1})) \\ &\quad + \lambda_2 (D_h(x_t^L||v_t) - D_h(x_t^L||x_t) - D_h(x_t||v_t)). \end{aligned} \tag{38}$$

831 Recall that  $h$  is  $\alpha$ -strongly convex and  $\beta$ -strongly smooth with respect to the norm  $\|\cdot\|$ , hence

$$\forall x, y, \frac{\alpha}{2} \|x - y\|^2 \leq D_h(x||y) \leq \frac{\beta}{2} \|x - y\|^2. \tag{39}$$

832 Therefore

$$D_h(x_t^L||v_t) - D_h(x_t^L||x_t) - D_h(x_t||v_t) \leq D_h(x_t^L||v_t) \leq \frac{\beta}{2} \|x_t^L - v_t\|^2 \leq \frac{\beta D^2}{2}.$$

833 In light of equation (38), we obtain

$$\langle \nabla f_t(x_t), x_t - x_t^L \rangle \leq \lambda_1 (D_h(x_t^L||x_{t-1}) - D_h(x_t^L||x_t) - D_h(x_t||x_{t-1})) + \frac{\beta D^2}{2} \cdot \lambda_2. \quad (40)$$

834 Let  $q > 0$  be a parameter which we will pick later. For all  $q > 0$ , it holds that

$$\begin{aligned} & f_t(x_t) - f_t(x_t^L) \\ & \leq \langle \nabla f_t(x_t), x_t - x_t^L \rangle - \frac{m}{2} \|x_t - x_t^L\|^2 \end{aligned} \quad (41a)$$

$$\begin{aligned} & \leq \lambda_1 (D_h(x_t^L||x_{t-1}) - D_h(x_t^L||x_t) - D_h(x_t||x_{t-1})) - \frac{m}{2} \|x_t - x_t^L\|^2 + \frac{\beta D^2}{2} \cdot \lambda_2 \quad (41b) \\ & = (\lambda_1 + q) (D_h(x_t^L||x_{t-1}) - D_h(x_t^L||x_t)) - \lambda_1 D_h(x_t||x_{t-1}) \\ & \quad - \left( q D_h(x_t^L||x_{t-1}) - q D_h(x_t^L||x_t) + \frac{m}{2} \|x_t - x_t^L\|^2 \right) \\ & \quad + \frac{\beta D^2}{2} \cdot \lambda_2. \end{aligned}$$

835 where we apply strong convexity in line (41a), and equation (40) in line (41b). Using Lemma 5, we  
836 obtain

$$\begin{aligned} & q D_h(x_t^L||x_{t-1}) - q D_h(x_t^L||x_t) + \frac{m}{2} \|x_t - x_t^L\|^2 \\ & = q D_h(x_t||x_{t-1}) + q \langle \nabla h(x_{t-1}) - \nabla h(x_t), x_t - x_t^L \rangle + \frac{m}{2} \|x_t - x_t^L\|^2 \\ & \geq q D_h(x_t||x_{t-1}) - q \|\nabla h(x_{t-1}) - \nabla h(x_t)\|_* \|x_t - x_t^L\| + \frac{m}{2} \|x_t - x_t^L\|^2 \end{aligned} \quad (42a)$$

$$\geq q D_h(x_t||x_{t-1}) - \left( \frac{q^2}{2m} \|\nabla h(x_{t-1}) - \nabla h(x_t)\|_*^2 + \frac{m}{2} \|x_t - x_t^L\|^2 \right) + \frac{m}{2} \|x_t - x_t^L\|^2 \quad (42b)$$

$$\begin{aligned} & = q D_h(x_t||x_{t-1}) - \frac{q^2}{2m} \|\nabla h(x_{t-1}) - \nabla h(x_t)\|_*^2 \\ & \geq q D_h(x_t||x_{t-1}) - \frac{\beta q^2}{m} D_h(x_t||x_{t-1}) \quad (42c) \\ & = \left( q - \frac{\beta q^2}{m} \right) D_h(x_t||x_{t-1}), \end{aligned}$$

837 where we apply the Cauchy-Schwartz inequality in line (42a), the AM-GM inequality in line (42b),  
838 and Lemma 1 in line (42c).

839 In order to maximize the coefficient  $\left( q - \frac{\beta q^2}{m} \right)$ , we set  $q = \frac{m}{2\beta}$ . By substituting inequality (42) into  
840 inequality (41), we obtain

$$\begin{aligned} & f_t(x_t) - f_t(x_t^L) \\ & \leq \left( \lambda_1 + \frac{m}{2\beta} \right) (D_h(x_t^L||x_{t-1}) - D_h(x_t^L||x_t)) - \left( \lambda_1 + \frac{m}{4\beta} \right) D_h(x_t||x_{t-1}) + \frac{\beta D^2}{2} \cdot \lambda_2. \end{aligned} \quad (43)$$

841 Using the condition  $\lambda_1 + \frac{m}{4\beta} \geq 1$ , we observe that

$$f_t(x_t) - f_t(x_t^L) + D_h(x_t||x_{t-1}) \left( \lambda_1 + \frac{m}{2\beta} \right) (D_h(x_t^L||x_{t-1}) - D_h(x_t^L||x_t)) + \frac{\beta D^2}{2} \cdot \lambda_2. \quad (44)$$

842 Notice that

$$\sum_{t=1}^T \|x_t^L - x_{t+1}^L\| \leq \sqrt{T \left( \sum_{t=1}^T \|x_t^L - x_{t+1}^L\|^2 \right)} \leq \sqrt{T \left( \sum_{t=1}^T \frac{2D_h(x_{t+1}^L||x_t^L)}{\alpha} \right)} \leq \sqrt{\frac{2TL}{\alpha}}. \quad (45)$$

843 where we use the generalized mean inequality in the first step and  $\alpha$ -strong convexity of  $h$  in the  
 844 second step (cf. equation (39)). By Lemma 6, we can give the following upper bound:

$$\begin{aligned}
 & \sum_{t=1}^T D_h(x_t^L || x_{t-1}) - D_h(x_t^L || x_t) \\
 &= \sum_{t=1}^T (D_h(0 || x_{t-1}) - D_h(0 || x_t) + \langle \nabla h(x_t) - \nabla h(x_{t-1}), x_t^L \rangle) \\
 &= D_h(0 || x_0) - D_h(0 || x_T) + \sum_{t=1}^{T-1} \langle \nabla h(x_t), x_t^L - x_{t+1}^L \rangle - \langle \nabla h(x_0), x_1^L \rangle + \langle \nabla h(x_T), x_T^L \rangle \\
 &\leq \sum_{t=1}^T \langle \nabla h(x_t), x_t^L - x_{t+1}^L \rangle \tag{46a}
 \end{aligned}$$

$$\leq \sum_{t=1}^T \|\nabla h(x_t)\|_* \|x_t^L - x_{t+1}^L\| \tag{46b}$$

$$\begin{aligned}
 &\leq G \sum_{t=1}^T \|x_t^L - x_{t+1}^L\| \\
 &\leq G \sqrt{\frac{2TL}{\alpha}}, \tag{46c}
 \end{aligned}$$

845 where we use the facts  $x_0 = x_0^L = x_{T+1}^L = 0, \nabla h(0) = 0$  in line (46a), the Cauchy-Schwartz  
 846 inequality in line (46b), and inequality (45) in line (46c).

847 Therefore we obtain

$$\begin{aligned}
 & \text{cost}(OBD) - \text{cost}(OPT(L)) \\
 &= \sum_{t=1}^T (f_t(x_t) + D_h(x_t || x_{t-1})) - (f_t(x_t^L) + D_h(x_t^L || x_{t-1}^L)) \tag{47a}
 \end{aligned}$$

$$\begin{aligned}
 &\leq \left( \sum_{t=1}^T f_t(x_t) - f_t(x_t^L) + D_h(x_t || x_{t-1}) \right) - L \\
 &\leq \left( \lambda_1 + \frac{m}{2\beta} \right) G \sqrt{\frac{2TL}{\alpha}} + T \cdot \frac{\beta D^2}{2} \cdot \lambda_2 - L, \tag{47b}
 \end{aligned}$$

848 where we use the definition of  $OPT(L)$  in line (47a); inequalities (44) and (46) in line (47b).

849 Since by assumption we have  $G < \infty, \lambda_2 = \eta(T, L, D, G) \leq \frac{KG}{D^2} \cdot \sqrt{\frac{L}{T}}$  for some constant  $K$ , by  
 850 inequality (47), we obtain

$$\text{cost}(OBD) - \text{cost}(OPT(L)) = O(G\sqrt{TL}),$$

851 which completes the proof.
